# Supplementary material
Source: PubMed Central journal article supplement (PMC4644495)

**Supplemental Table S2.** Ethnic-specific number of events and the event rate (percent per year) in each BP category

| BP categories | Blacks           |                            | Whites           |                            | Hispanics        |                            |
|---------------|------------------|----------------------------|------------------|----------------------------|------------------|----------------------------|
|               | number of events | Events per 100 person-year | number of events | Events per 100 person-year | number of events | Events per 100 person-year |
| NT            | 29               | 0.51                       | 21               | 0.39                       | 2                | 0.07                       |
| WCH           | 9                | 1.73                       | 0                | 0                          | 1                | 0.83                       |
| MH            | 36               | 1.60                       | 13               | 0.91                       | 4                | 0.75                       |
| SH            | 56               | 2.32                       | 11               | 1.27                       | 8                | 2.96                       |

Supplemental Table S1: Baseline characteristics of participants (a) untreated and (b) treated with anti-hypertensive medication.

a) Untreated

| <b>Variables</b>       | <b>NT (n=1572)</b> | <b>WCH (n=80)</b> | <b>MH (n=413)</b> | <b>SH (n=317)</b> | <b>p value *</b> |
|------------------------|--------------------|-------------------|-------------------|-------------------|------------------|
| Age, y                 | 39 [34,46]         | 47 [39,54]        | 45 [39,51]        | 48 [41,54]        | <0.0001          |
| Men, %                 | 44.7               | 45                | 49.4              | 46.4              | 0.39             |
| Black, %               | 40.5               | 60                | 51.3              | 64.7              | <0.0001          |
| White, %               | 34.4               | 25                | 34.1              | 24.3              | 0.002            |
| Hispanic, %            | 22.6               | 15                | 13.8              | 8.8               | <0.0001          |
| HTN, %                 | 1.7                | 11.3              | 51.1              | 85.5              | <0.0001          |
| DM, %                  | 4.7                | 15                | 10.9              | 12.3              | <0.0001          |
| BMI, kg/m <sup>2</sup> | 28 [24,32]         | 31 [25,37]        | 30 [26,35]        | 31 [27,36]        | <0.0001          |
| Smokers, %             | 26.4               | 33.8              | 30.3              | 33.2              | 0.032            |
| HL, %                  | 5.7                | 7.5               | 9.7               | 11                | 0.001            |
| CVD, %                 | 2.3                | 5                 | 4.1               | 6.9               | 0.0003           |
| SBP <sub>H</sub> mmHg  | 116±10             | 123±8             | 140±11            | 152±17            | <0.0001          |
| DBP <sub>H</sub> mmHg  | 74±6               | 77±5              | 87±6              | 91±9              | <0.0001          |
| SBP <sub>C</sub> mmHg  | 117±10             | 146±11            | 126±8             | 152±14            | <0.0001          |
| DBP <sub>C</sub> mmHg  | 74±7               | 88±6              | 79±6              | 92±8              | <0.0001          |

b) Treated

| <b>Variables</b>       | <b>NT (n=232)</b> | <b>WCH (n=43)</b> | <b>MH (n=169)</b> | <b>SH (n=201)</b> | <b>p value *</b> |
|------------------------|-------------------|-------------------|-------------------|-------------------|------------------|
| Age, y                 | 51 [45,57]        | 51 [45,57]        | 53 [47,58]        | 53 [45,58]        | 0.23             |
| Men, %                 | 39.2              | 37.2              | 40.2              | 44.8              | 0.63             |
| Black, %               | 50.0              | 69.8              | 66.9              | 75.6              | <0.0001          |
| White, %               | 37.1              | 23.3              | 22.5              | 15.9              | <0.0001          |
| Hispanic, %            | 10.8              | 7.0               | 8.9               | 7.0               | 0.57             |
| DM, %                  | 19.8              | 32.6              | 32.5              | 35.3              | 0.002            |
| BMI, kg/m <sup>2</sup> | 31 [27,36]        | 34 [27,39]        | 32 [28,38]        | 32 [28,37]        | 0.36             |
| Smokers, %             | 25.4              | 14.0              | 27.8              | 31.0              | 0.12             |
| HL, %                  | 44.8              | 39.5              | 35.5              | 25.4              | 0.0004           |
| CVD, %                 | 22.4              | 25.6              | 23.7              | 22.4              | 0.95             |
| SBP <sub>H</sub> mmHg  | 120±9             | 122±9             | 145±15            | 157±17            | <0.0001          |
| DBP <sub>H</sub> mmHg  | 75±6              | 76±7              | 87±8              | 92±11             | <0.0001          |
| SBP <sub>C</sub> mmHg  | 121±10            | 145±11            | 128±8             | 154±15            | <0.0001          |
| DBP <sub>C</sub> mmHg  | 76±7              | 88±8              | 78±7              | 89±8              | <0.0001          |

Figure S1: Incident hypertension requiring antihypertensive treatment among initially untreated participants who completed imaging studies in DHS-1 and returned for DHS-2 over the median follow-up of 7 years (N=1,623)

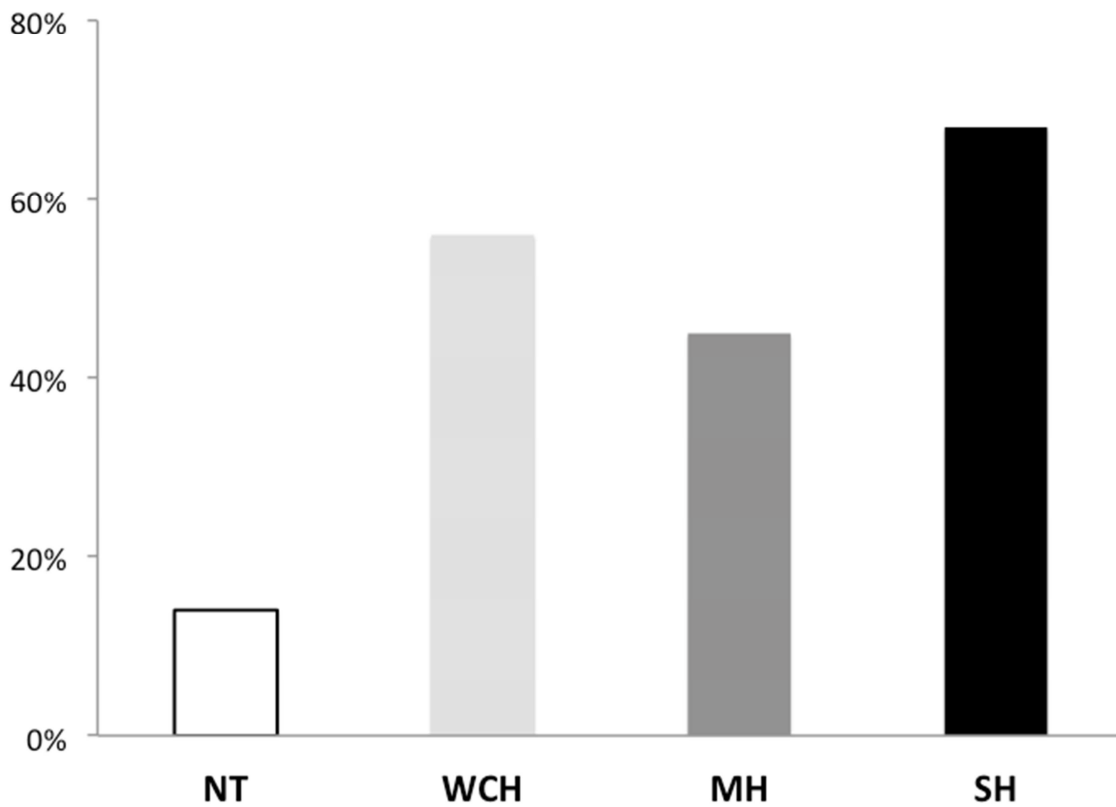

Supplement: NIHMS723647-supplement-supplement_1.pdf [file NIHMS723647-supplement-supplement_1.pdf]
